# Supplementary material for: Lactate: an alternative pathway for the immunosuppressive properties of mesenchymal stem/stromal cells
Source: PubMed Central journal article supplement (PMC10659074; doi:10.1186/s13287-023-03549-4), 2023-11-19

Supplementary Figure 6

A)

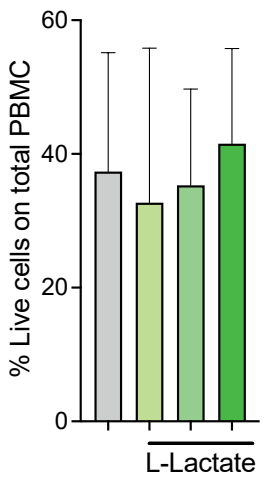

B)

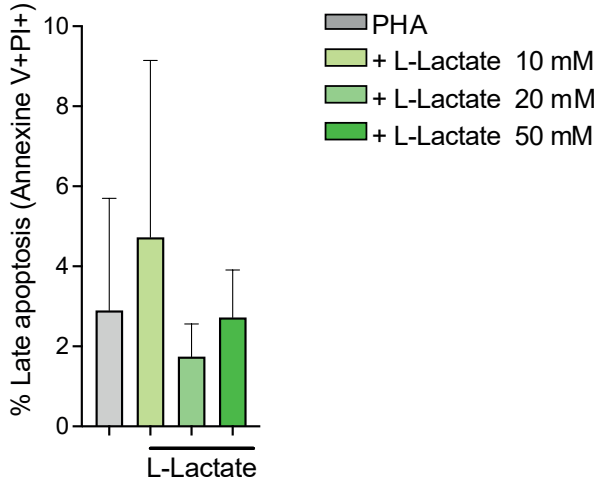

Supplement: 13287_2023_3549_MOESM6_ESM.pdf [file 13287_2023_3549_MOESM6_ESM.pdf]
